# Supplementary material for: Collision-induced and complex-mediated roaming dynamics in the H + C2H4 → H2 + C2H3 reaction
Source: Royal Society of Chemistry journal article supplement (doi:10.1039/c9sc05951b), 2020-01-01
Supplement: c9sc05951b4.pdf [file c9sc05951b4.pdf]

## Supplementary Information

### Collision-induced and complex-mediated roaming dynamics in the H + C<sub>2</sub>H<sub>4</sub> → H<sub>2</sub> + C<sub>2</sub>H<sub>3</sub> reaction

Yan-Lin Fu<sup>a,b</sup>, Xiaoxiao Lu<sup>b</sup>, Yong-Chang Han<sup>a,\*</sup>, Bina Fu<sup>b,\*</sup>, Dong H. Zhang<sup>b,\*</sup>,  
Joel M. Bowman<sup>c,\*</sup>

<sup>a</sup>*Department of Physics, Dalian University of Technology, Dalian, China 116024*

<sup>b</sup>*State Key Laboratory of Molecular Reaction Dynamics*

*and Center for Theoretical and Computational Chemistry,*

*Dalian Institute of Chemical Physics,*

*Chinese Academy of Sciences, Dalian, China 116023*

<sup>c</sup>*Department of Chemistry and Cherry L. Emerson Center for Scientific Computation,*

*Emory University, Atlanta, Georgia 30322, USA*

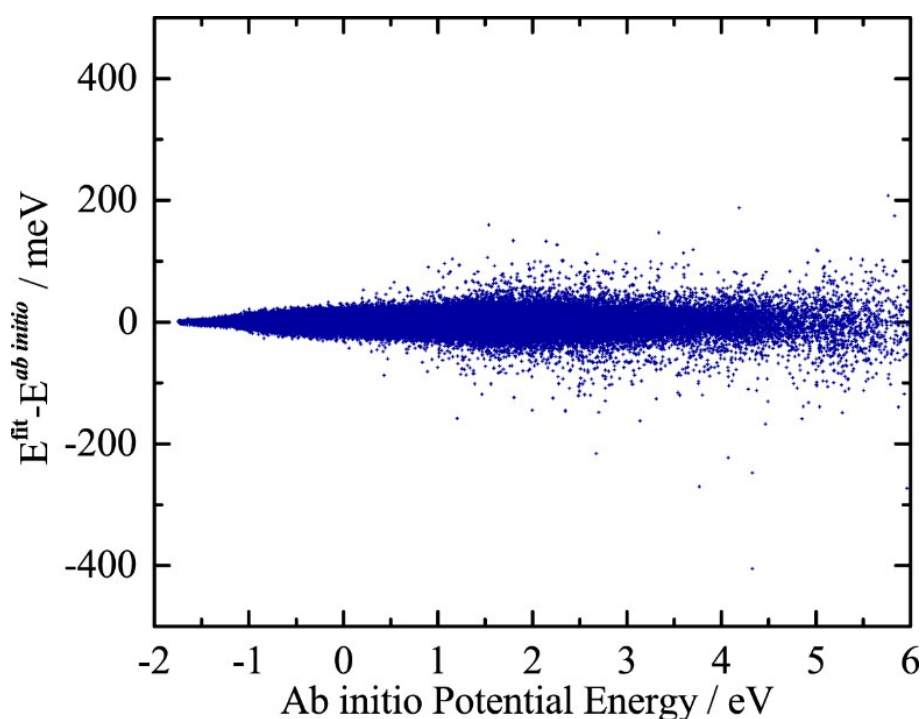

**Fig. S1** The fitting errors as a function of their corresponding *ab initio* potential energies of the data points on the FI-NN PES.

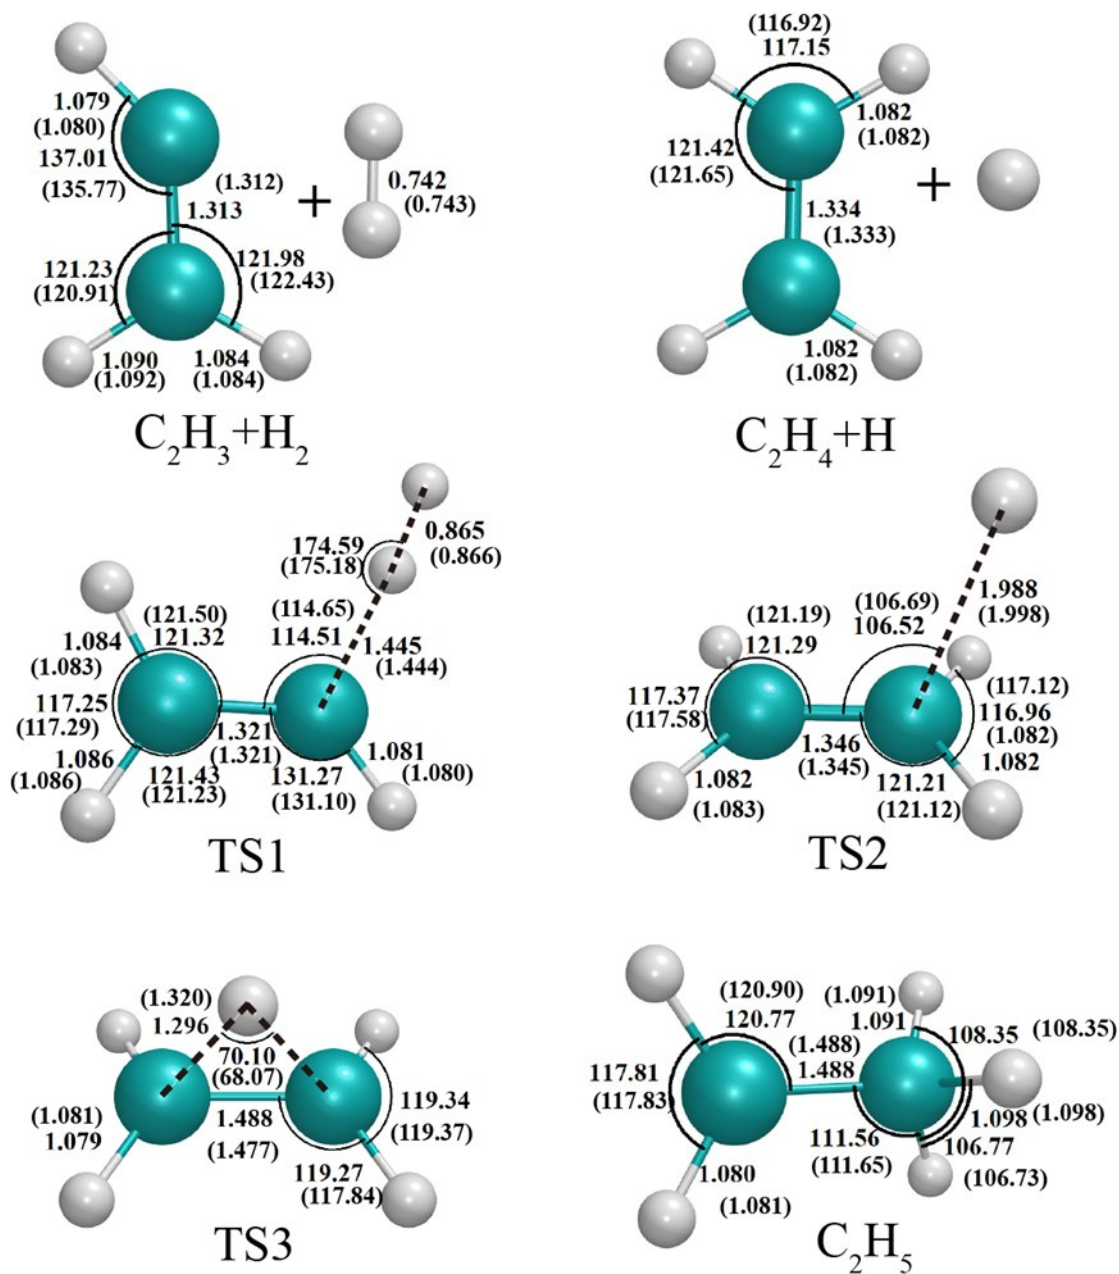

**Fig. S2** Optimized geometries (bond lengths in Å, angles in degree) of the reactant species, product species and transition states on the fitted PESs (in parentheses), compared with the results from the UCCSD(T)-F12/AVTZ calculations.

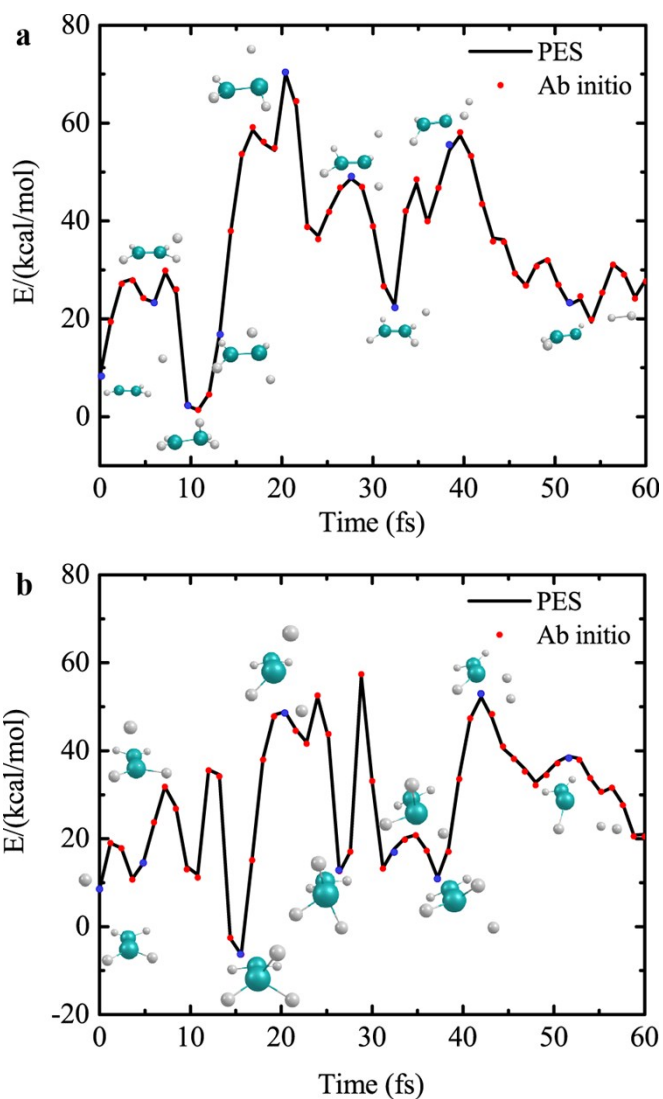

**Fig. S3** Comparisons of potential energies between direct UCCSD(T)-F12/AVTZ calculations and fitted results from the FI-NN PES for two representative trajectories with the collision-induced roaming mechanism. (a) backward scattering; (b) forward scattering. Snapshots at selected reaction time are also depicted.

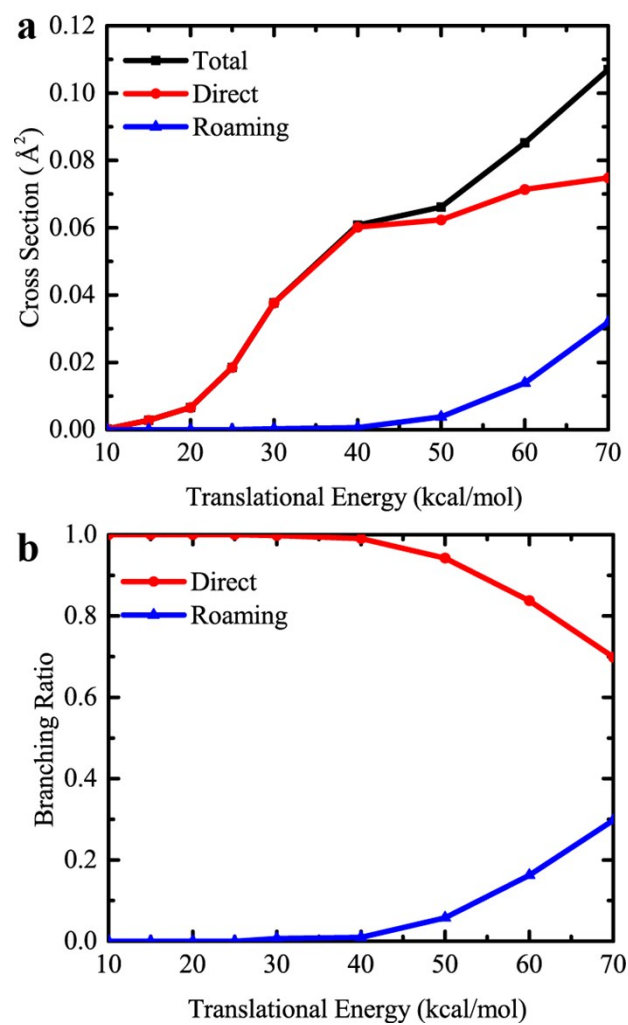

**Fig. S4** (a) Cross sections of the direct abstraction and roaming pathways. (b) Same as (a), except for the branching fractions.

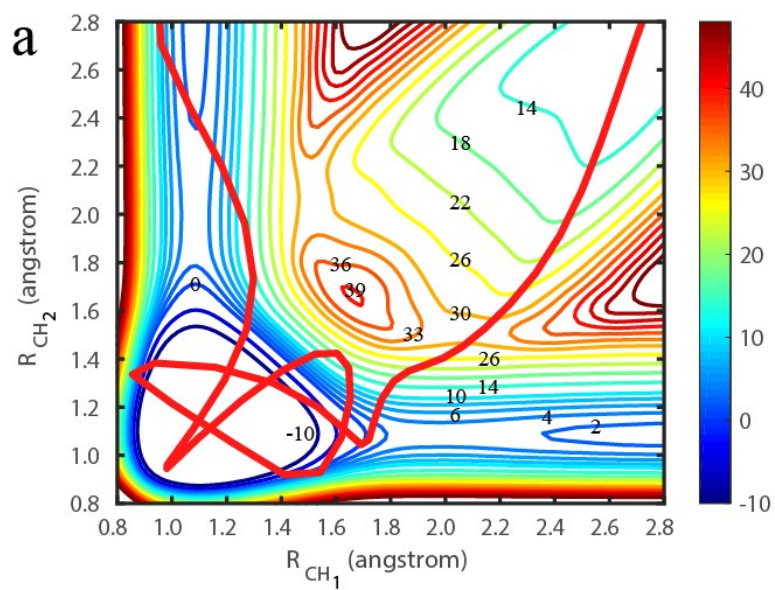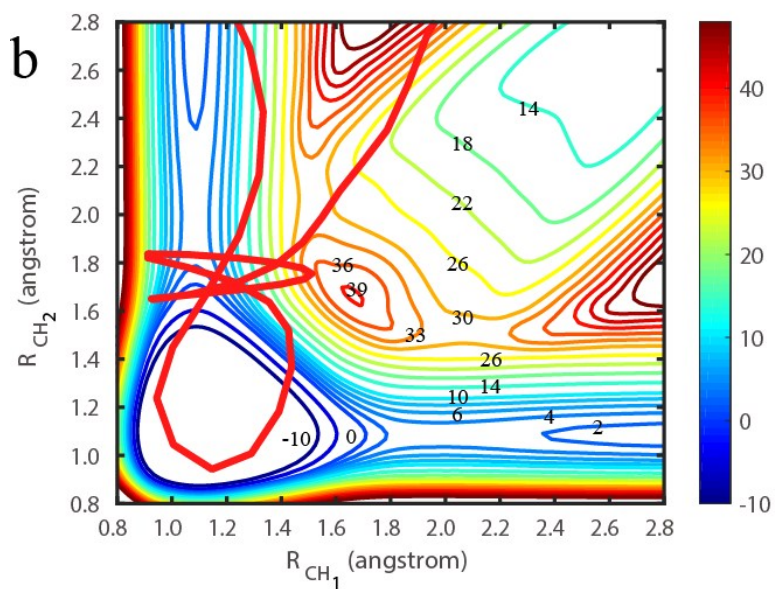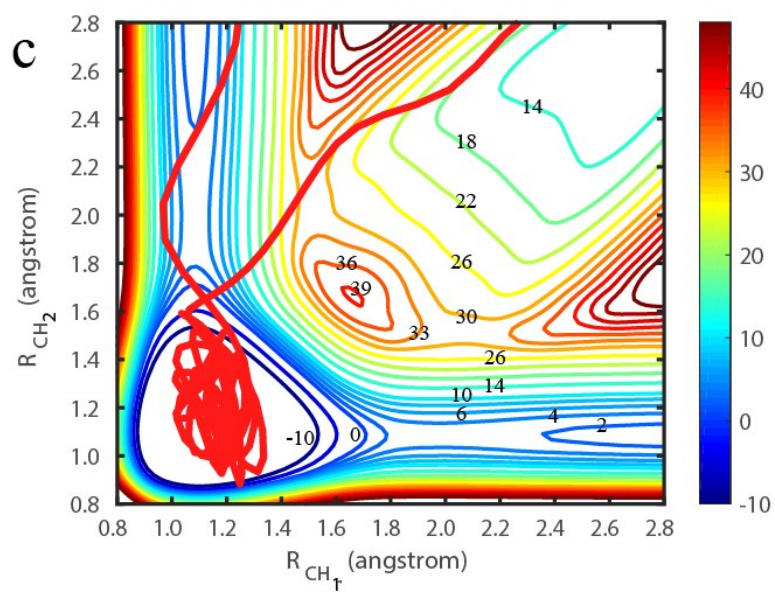



**Fig. S5** Contour plots of PES as functions of two CH internuclear distances ( $\text{RCH}_1$  and  $\text{RCH}_2$ ) of  $\text{C}_2\text{H}_5$ , with other coordinates (degrees of freedom) optimized. Note that roaming occurs when the dihedral  $\phi$  between the plane of  $\text{C-C-H}_1$  and  $\text{C-C-H}_2$  larger than  $30^\circ$ , which is quite different from the direct abstraction via  $\text{TS1}$  ( $\phi$  around  $0^\circ$ ), we restricted this dihedral  $>30^\circ$  in the optimization to distinguish the roaming channel from the direct abstraction channel. The evolution of three typical roaming trajectories is also superimposed on the contour plots of PES, namely two collision-induced roaming trajectories (a, b) with extremely short reaction time and a complex-mediated roaming trajectory with long-lived complex (c).

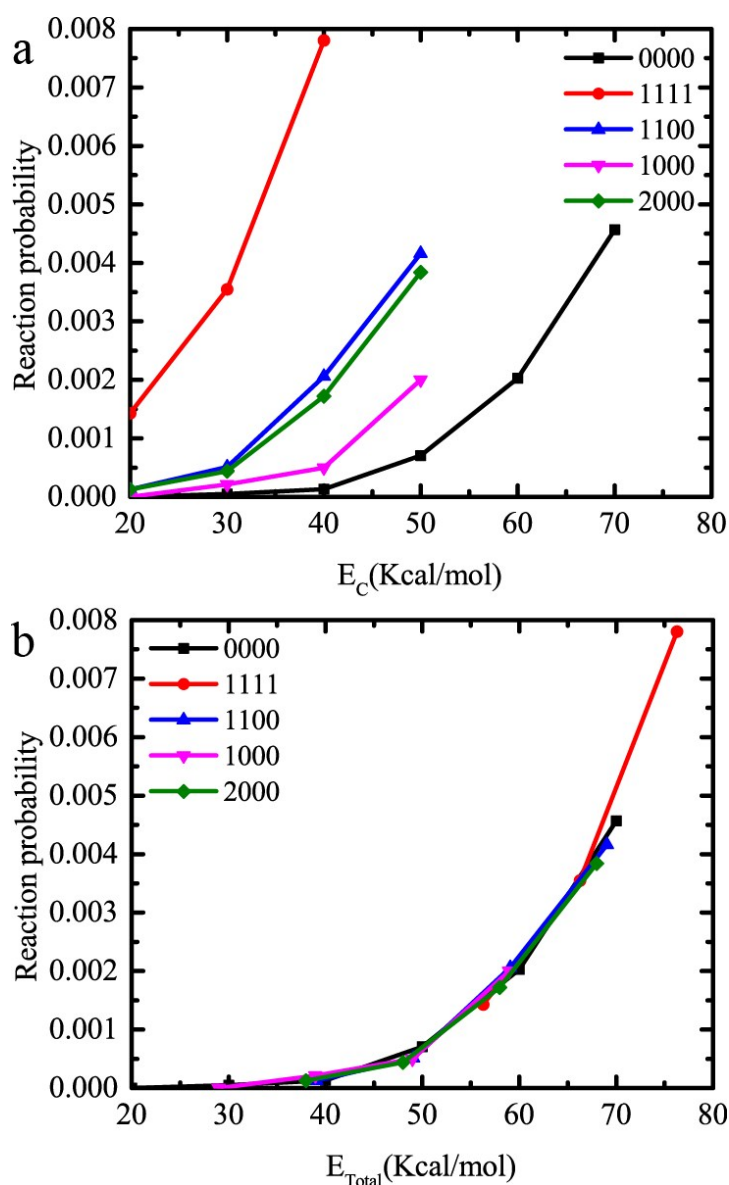

**Fig. S6** (a) The reaction probabilities as a function of collision energy of roaming from different vibrational excitations of various modes of  $\text{C}_2\text{H}_4$ , at the impact

parameter  $b=0$ . Here, the notations ( $v_1, v_2, v_3, v_4$ ) correspond to the symmetric stretch and asymmetric stretch of  $\text{CH}_2$  ( $v_1$  and  $v_2$ ), and symmetric and asymmetric stretch of another  $\text{CH}_2$  ( $v_3$  and  $v_4$ ) of the reactant  $\text{C}_2\text{H}_4$ . (b) The same as a), except as a function of total energy.

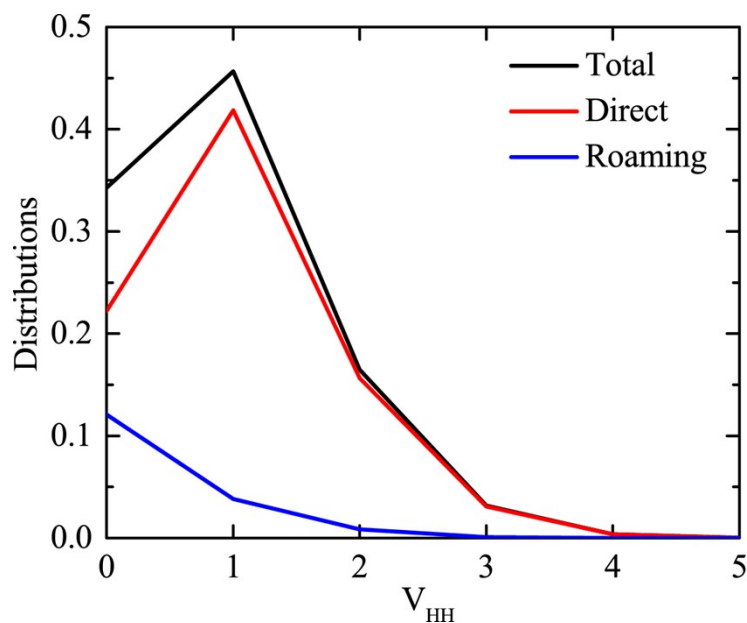

**Fig. S7** The final vibrational state distributions of  $\text{H}_2$  from the direct abstraction and roaming pathways.

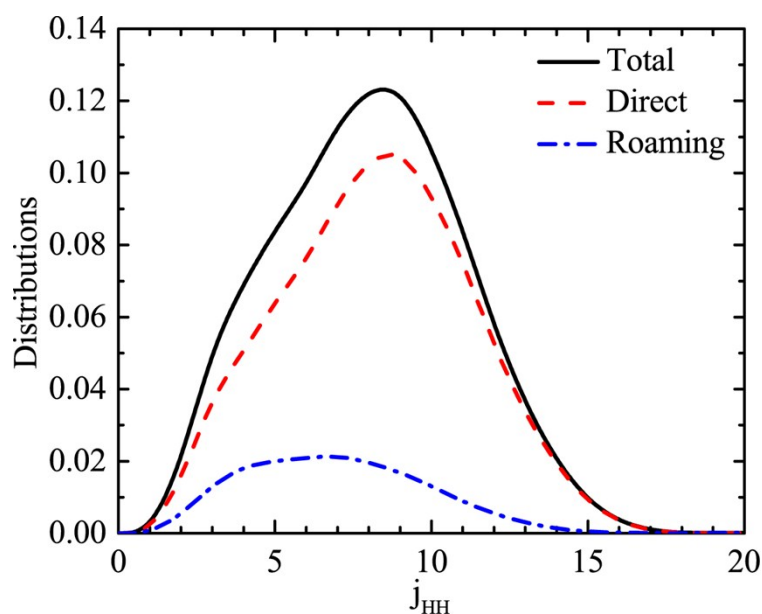

**Fig. S8** The final rotational state distributions of  $\text{H}_2$  from the direct abstraction and roaming pathways.

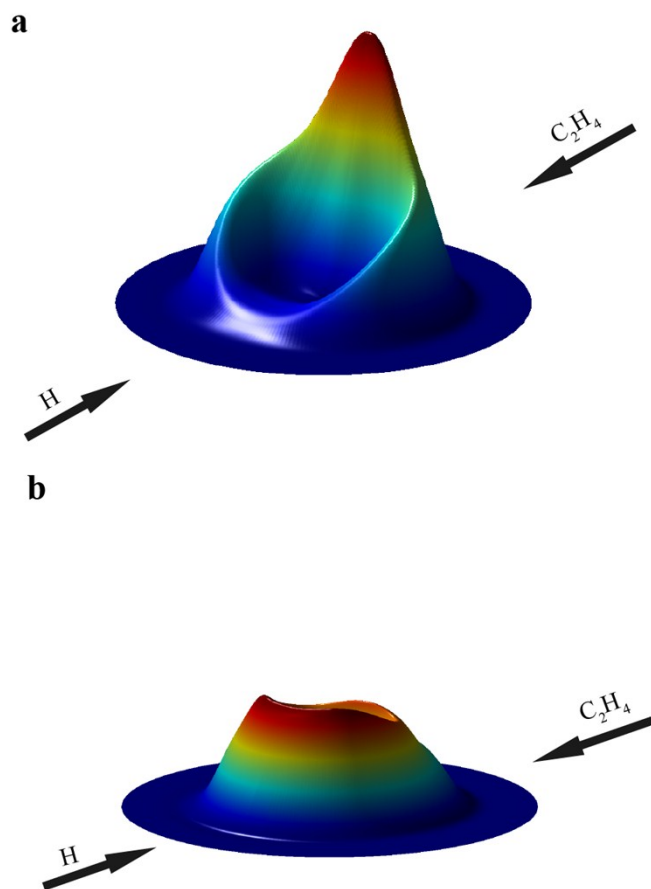

**Fig. S9** (a) 3D polar plot for the product translational energy and angular distributions of the  $\text{H}_2$  channel from the direct abstraction pathway. Direct abstraction. (b) Same as (a), except for the roaming pathway.



|               | TS1              |                  | TS2             |                 | TS3              |                  |
|---------------|------------------|------------------|-----------------|-----------------|------------------|------------------|
|               | Ab               | PES              | Ab              | PES             | Ab               | PES              |
| $\omega_1$    | <i>i</i> 1270.23 | <i>i</i> 1301.29 | <i>i</i> 704.24 | <i>i</i> 703.60 | <i>i</i> 1912.47 | <i>i</i> 2089.70 |
| $\omega_2$    | 270.12           | 263.36           | 354.49          | 326.37          | 564.87           | 564.12           |
| $\omega_3$    | 362.14           | 361.83           | 389.00          | 367.60          | 731.73           | 609.45           |
| $\omega_4$    | 813.29           | 854.26           | 821.01          | 832.45          | 737.89           | 685.81           |
| $\omega_5$    | 881.90           | 875.14           | 924.13          | 913.08          | 781.30           | 750.50           |
| $\omega_6$    | 911.74           | 908.64           | 980.99          | 962.55          | 1132.93          | 1153.42          |
| $\omega_7$    | 941.08           | 946.36           | 1035.46         | 1051.75         | 1194.98          | 1278.58          |
| $\omega_8$    | 1071.08          | 1078.08          | 1245.47         | 1259.06         | 1274.74          | 1307.37          |
| $\omega_9$    | 1142.32          | 1156.00          | 1338.55         | 1359.34         | 1422.61          | 1364.14          |
| $\omega_{10}$ | 1395.87          | 1426.85          | 1473.72         | 1453.99         | 1450.72          | 1409.77          |
| $\omega_{11}$ | 1608.39          | 1604.87          | 1623.78         | 1635.55         | 2222.30          | 2251.82          |
| $\omega_{12}$ | 2059.08          | 2012.38          | 3144.00         | 3132.74         | 3162.40          | 3046.28          |
| $\omega_{13}$ | 3108.29          | 3117.89          | 3155.71         | 3154.13         | 3167.56          | 3061.88          |
| $\omega_{14}$ | 3196.35          | 3192.33          | 3227.60         | 3241.63         | 3272.06          | 3238.71          |
| $\omega_{15}$ | 3218.63          | 3218.63          | 3252.33         | 3261.70         | 3292.13          | 3270.81          |

|               | H <sub>2</sub> |         | C <sub>2</sub> H <sub>3</sub> |         | C <sub>2</sub> H <sub>4</sub> |         | C <sub>2</sub> H <sub>5</sub> |         |
|---------------|----------------|---------|-------------------------------|---------|-------------------------------|---------|-------------------------------|---------|
|               | Ab             | PES     | Ab                            | PES     | Ab                            | PES     | Ab                            | PES     |
| $\omega_1$    | 4400.54        | 4396.43 | 714.49                        | 751.47  | 823.81                        | 837.01  | 118.64                        | 78.66   |
| $\omega_2$    |                |         | 809.72                        | 835.61  | 946.00                        | 957.43  | 470.66                        | 454.05  |
| $\omega_3$    |                |         | 912.60                        | 915.84  | 964.36                        | 959.58  | 810.16                        | 802.34  |
| $\omega_4$    |                |         | 1066.16                       | 1050.88 | 1038.34                       | 1027.43 | 988.09                        | 987.85  |
| $\omega_5$    |                |         | 1392.16                       | 1424.96 | 1247.35                       | 1248.26 | 1072.30                       | 1070.51 |
| $\omega_6$    |                |         | 1616.94                       | 1603.72 | 1367.68                       | 1374.69 | 1202.23                       | 1194.49 |
| $\omega_7$    |                |         | 3070.66                       | 3071.35 | 1476.77                       | 1485.81 | 1406.41                       | 1407.82 |
| $\omega_8$    |                |         | 3177.07                       | 3182.13 | 1670.76                       | 1663.95 | 1477.75                       | 1477.11 |
| $\omega_9$    |                |         | 3247.92                       | 3246.74 | 3139.98                       | 3119.89 | 1492.69                       | 1495.69 |
| $\omega_{10}$ |                |         |                               |         | 3155.42                       | 3147.03 | 1493.29                       | 1501.47 |
| $\omega_{11}$ |                |         |                               |         | 3221.66                       | 3217.38 | 2981.70                       | 2989.17 |
| $\omega_{12}$ |                |         |                               |         | 3247.64                       | 3223.43 | 3065.61                       | 3071.82 |
| $\omega_{13}$ |                |         |                               |         |                               |         | 3111.35                       | 3107.79 |
| $\omega_{14}$ |                |         |                               |         |                               |         | 3157.39                       | 3157.11 |
| $\omega_{15}$ |                |         |                               |         |                               |         | 3261.51                       | 3253.76 |

**Table S1** Comparisons of the vibrational frequencies of the transition states (upper) and stationary points (lower) between the results of direct UCCSD(T)-F12a/AVTZ calculations and PES.

**Movie S1.** Real time video showing the evolution of one collision-induced roaming trajectory, which yields the backward-scattered product.

**Movie S2.** Real time video showing the evolution of one collision-induced roaming trajectory, which yields the forward-scattered product.

## SUPPLEMENTARY METHODS

### A. Potential energy surface (PES)

In this work, the spin unrestricted explicitly correlated coupled-cluster method with singles, doubles, and perturbative triples (UCCSD(T)-F12a), together with Dunning's augmented correlation-consistent triple-zeta (aug-cc-pVTZ) basis set has been used to optimize the stationary points and obtain the single-point energies of the data set of the current PES. All the *ab initio* calculations were implemented in the MOLPRO 2012.1.<sup>1,2</sup> A total of 101459 UCCSD(T)-F12a/aug-cc-pVTZ energy points were fitted by the fundamental-invariant neural network (FI-NN) approach.<sup>3,4,5</sup> Considering the possible multi-reference character in some regions of the PES, further T1 diagnostic calculations were carried out to check the reliability and monitor the quality of coupled cluster calculations. A small number of energy points with T1 diagnostic values larger than 0.05 was discarded. Actually we only discarded about 200 data points during the calculations, indicating the reliability of current coupled cluster calculations.

The FI-NN approach uses the fundamental invariants (FIs) as the input vector of NN function, which guarantee the permutational symmetry of the PES. The FIs minimize the size of input invariants and consists of the least number of invariants at a specified truncated or maximum degree. Thus, FI-NN can efficiently reduce the evaluation time of potential energy compared to the corresponding PIP-NN PESs, in particular for larger molecular systems with more identical atoms.<sup>3,4</sup>

The neural network (NN) method is a general fitting method, which is extremely flexible and in principle it can be used to fit any shape of function with very high accuracy.<sup>6</sup> The structure of the feedforward NN is 171-20-40-1, which contains 171 FIs (up to the maximum degree of 5) as the input, 20 and 40 neurons in two hidden layers, and a done output of potential energy.

The functional form we used can be written as:

$$y = b^3 + \sum_{k=1}^K \omega_k^3 \cdot f^2 \left[ b_k^2 + \sum_{j=1}^J \omega_{jk}^2 \cdot f^1 \left( b_j^1 + \sum_{i=1}^I \omega_{ij}^1 \cdot x_i \right) \right] \quad (1)$$

where  $x_i$  ( $i=1,\dots,I$ ) is the input vector, chosen as 171 FIs here, and  $y$  is the output of NN function, corresponding to the potential energy.

In the process of fitting, we get input vectors and corresponding ab initio energies  $E_n^{ab\ initio}$  ( $n = 1,\dots,N$ ) from a data set containing  $N$  points. After evaluating the NN function for each geometry, we get the fitted energies  $E_n^{fit}$  ( $n = 1,\dots,N$ ). In the FI-NN fitting, roughly 95% of the energy points were selected randomly as the fitting set, while the other 5% of the energy points were left as the validating set. We used the Levenberg-Marquardt algorithm<sup>7</sup> to adjust the parameter of NN, and the fitting quality can be represented by the root mean square error (RMSE):

$$RMSE = \sqrt{\frac{1}{N} \sum_{n=1}^N (E_n^{ab\ initio} - E_n^{fit})^2} \quad (2)$$

In addition, the “early stopping” method was used to avoid over fitting.<sup>8</sup>

The energy points were selected properly based on direct dynamics simulations and further QCT calculations. The initial 50000 data points were taken from direct dynamic calculations using the unrestricted B3LYP/6-31+g\* method, and then further evaluated by the UCCSD(T)-F12a/aug-cc-pVTZ level of theory. Starting from the first PES based on the initial 50000 UCCSD(T)-F12a/aug-cc-pVTZ energies, more energies points were added interactively by performing QCT calculations on those preliminary PESs. Extensive QCT calculations of the  $H + C_2H_4$  reaction were carried out to validate the convergence of the fitted PES with respect to the number of energy points. The final FI-NN PES, which is the average of five PESs with minimum RMSEs, results in a RMSE of 13.02 (~0.3 kcal/mol) meV for energies up to 6.0 eV relative to the energy of  $H + C_2H_4$ .

The PES fits well to the ab initio energies as can be seen from Supplementary Fig. 1, which shows the fitting errors of all data points as a function of their corresponding ab initio energies. This fit results in an overall root mean square error (RMSE) of only 13.7 meV (~0.3 kcal/mol), representing an unprecedented fitting accuracy for PESs of seven-atom multichannel reactions. A comparison of the geometries of the reactant species, product

species and transition states on the fitted PESs and directly from the ab initio UCCSD(T)-F12 calculations is given in Supplementary Figure 2. As shown, the PES describes the stationary points with good accuracy, with the maximum deviation of bond length from UCCSD(T)-F12 results of roughly 1.8% and bond angle of 2.9%. The normal mode frequencies of various species calculated by the UCCSD(T)-F12a/AVTZ method, as well as the corresponding frequencies obtained on the PES are summarized in Supplementary Table 1. The current PES also reproduces well the vibrational frequencies as compared with the direct ab initio calculations.

## B. Quasi-classical trajectory calculations

Standard QCT calculations<sup>9,10</sup> for the C<sub>2</sub>H<sub>4</sub>+H reaction were carried out on our PES with C<sub>2</sub>H<sub>4</sub> initially in the ground vibrational state. The quasiclassical ground vibrational state of C<sub>2</sub>H<sub>4</sub> was set by randomly sampling the normal coordinates and momenta. The rotational energy of C<sub>2</sub>H<sub>4</sub> was sampled from the thermal distribution at 300 K. The initial distance of the H atom from the center of mass of C<sub>2</sub>H<sub>4</sub> was  $\sqrt{x^2 + b^2}$ , where b is the impact parameter and x was set to 6.0 Å. The orientation of C<sub>2</sub>H<sub>4</sub> was randomly sampled with respect to the H atom, and b was scanned from 0 to b<sub>max</sub> with a step size of 0.2 Å, where b<sub>max</sub> is the maximum impact parameter. All the trajectories were propagated with a time step of 0.1 fs for a maximum time of 50 ps, using the velocity-Verlet integration scheme, with conserved energies within 0.03 kcal/mol. If the two fragments reach a separation of 6.0 Å, we terminate the trajectory.

Because the detailed dynamical information of product is obtained at the collision energy (Ec) of 60 kcal/mol, we ran much more trajectories at Ec =60kcal/mol than those at other collision energies, for which only the total cross sections and branching ratios of the direct abstraction and roaming pathways were obtained. Specifically, a total of about 30 million trajectories were run at Ec =60kcal/mol, and roughly 1.5 million trajectories were run at the collision energies of 30 kcal/mol, 40 kcal/mol, 50 kcal/mol and 70 kcal/mol, respectively. Because the QCT calculations can result in the ZPE violation of products, the soft-ZPE constrained treatments are used to analyze the final dynamical information of products. The

soft-ZPE constrained analysis considers those trajectories in which the sum of the vibrational energies of the products is not less than the sum of the corresponding ZPEs.

In this work, two classes of trajectories that result in the  $\text{H}_2 + \text{C}_2\text{H}_3$  product channel were observed, i.e., (i) the direct abstraction pathway via TS1 without the  $\text{C}_2\text{H}_5$  intermediate-forming, (ii) roaming pathway via short-lived  $\text{C}_2\text{H}_5$  adduct or long-lived  $\text{C}_2\text{H}_5$  complex-forming. To determine whether the  $\text{C}_2\text{H}_5$  intermediate is formed in a given trajectory, we used the following criterion. If one of the distances between the incoming H atom and two carbon atoms has at least two turning points, and there exists two local minima with the C-H distances smaller than  $1.9 \text{ \AA}$ , we classify these trajectories as the  $\text{C}_2\text{H}_5$  intermediate-forming ones. In addition, for a given  $\text{C}_2\text{H}_5$  intermediate-forming trajectory, we found that the interval between the two hydrogen atoms leaving the carbon atom is greater than 10 fs, which can be a typical character of roaming trajectory.

#### SUPPLEMENTARY REFERENCES

---

- <sup>1</sup> Werner, H. J., Knowles P. J., Knizia, G., Manby, F. R. & Schütz, M. Molpro: a general-purpose quantum chemistry program package. *Wiley Interdiscip. Rev. Comput. Mol. Sci.* 2012, **2**, 242–253.
- <sup>2</sup> Werner H.-J. et al. MOLPRO, version 2012.1, a package of ab initio programs.  
<http://www.molpro.net>.
- <sup>3</sup> Shao, K., Chen, J., Zhao, Z. & Zhang, D.H. Communication: Fitting potential energy surfaces with fundamental invariant neural network. *J. Chem. Phys.* 2016, **145**, 071101.
- <sup>4</sup> Fu, B. & Zhang, D.H. Ab initio potential energy surfaces and quantum dynamics for polyatomic bimolecular reactions. *J. Chem. Theory Comput.* 2018, **14**, 2289-2303.
- <sup>5</sup> Lu, X., Shao, K., Fu, B., Wang, X. & Zhang, D. H. An accurate full-dimensional potential energy surface and quasiclassical trajectory dynamics of the  $\text{H} + \text{H}_2\text{O}_2$  two-channel reaction. *Phys. Chem. Chem. Phys.* 2018, **20**, 23095-23105.
- <sup>6</sup> Raff, L. M., Komanduri, R., Hagan, M & Bukkapatnam, S. *Neural networks in chemical reaction dynamics*, Oxford University Press, New York, 2012.
- <sup>7</sup> Hagan, M. T. & Menhaj, M. B., *IEEE Transactions on Neural Networks*, **5**, 989 (1994).
- <sup>8</sup> Sarle, W. S. *Proceedings of the 27th Symposium on the Interface of Computing Science and Statistics*, 1995, 352–360.
- <sup>9</sup> Hase, W. L. *Encyclopedia of Computational Chemistry*, ed. N. L. Allinger, Wiley, New York, 2002, **1**, 309–407.
- <sup>10</sup> B. Fu, B. Shepler, J. M. Bowman, Three-state trajectory surface hopping studies of the photodissociation dynamics of formaldehyde on ab initio potential energy surfaces, *J. Am.*

---

*Chem. Soc.*, 2011, **133**, 7957-7968.
